# THE EVOLUTION OF BEQUEATHAL IN STABLE HABITATS

PARRY M.R. CLARKE<sup>1</sup>, MARY BROOKE MCELREATH<sup>2,3</sup>, BRENDAN J. BARRETT<sup>2,3</sup>,  
KAREN E. MABRY<sup>4</sup>, AND RICHARD MCELREATH<sup>1,3</sup>

ABSTRACT: Adults sometimes disperse while philopatric offspring inherit the natal site, a pattern known as *bequeathal*. Despite a decades-old empirical literature, little theoretical work has explored when natural selection may favor bequeathal. We present a simple mathematical model of the evolution of bequeathal in a stable environment, under both  
5 global and local dispersal. We find that natural selection favors bequeathal when adults are competitively advantaged over juveniles, baseline mortality is high, the environment is unsaturated, and when juveniles experience high dispersal mortality. However, frequently bequeathal may not evolve, because the fitness cost for the adult is too large relative to inclusive fitness benefits. Additionally, there are many situations for which bequeathal is  
10 an ESS, yet cannot invade the population. As bequeathal in real populations appears to be facultative, yet-to-be-modeled factors like timing of birth in the breeding season may strongly influence the patterns seen in natural populations.

**Keywords:** natal philopatry, breeding dispersal, parental investment, parent-offspring conflict, territory inheritance, evolutionary game theory

---

<sup>1</sup> DEPARTMENT OF ANTHROPOLOGY, UNIVERSITY OF CALIFORNIA, DAVIS, ONE SHIELDS AVENUE, DAVIS, CA 95616, UNITED STATES

<sup>2</sup> COGNITIVE AND CULTURAL ECOLOGY RESEARCH GROUP, MAX PLANCK INSTITUTE FOR ORNITHOLOGY, AM OBSTBERG 1, 78315 RADOLFZELL, GERMANY

<sup>3</sup> DEPARTMENT OF HUMAN BEHAVIOR, ECOLOGY, AND CULTURE, MAX PLANCK INSTITUTE FOR EVOLUTIONARY ANTHROPOLOGY, DEUTSCHER PLATZ 6, 04103 LEIPZIG, GERMANY

<sup>4</sup>DEPARTMENT OF BIOLOGY, NEW MEXICO STATE UNIVERSITY, LAS CRUCES NM 88003, UNITED STATES  
*E-mail address:* mary\_mcelreath@eva.mpg.de.

## 1. INTRODUCTION

16 In this paper, we develop the first evolutionary models of *bequeathal*. Bequeathal is a  
type of breeding dispersal which occurs when a parent disperses to a new site, leaving  
18 a philopatric offspring to inherit the natal site and its resources. We know bequeathal  
occurs in nature from field studies of four mammal species: Columbian ground squirrels,  
20 *Urocitellus columbianus* (Harris and Murie 1984); kangaroo rats, *Dipodomys spectabilis*  
(Jones 1986); red squirrels, *Tamiasciurus hudsonicus* (Price and Boutin 1993, Berteaux  
22 and Boutin 2000); and woodrats *Neotoma macrotis* (Linsdale and Tevis 1951, Cunningham  
2005). There is also evidence that it may occur in several other species: common wombats,  
24 *Vombatus ursinus* (Banks et al. 2002); hairy-nosed wombats (Johnson and Crossman 1991),  
*Lasiorhinus krefftii*; plateau pika (Zhang et al. 2017) *Ochotona curzoniae*; and wolverines  
26 (Aronsson and Persson 2018), *Gulo gulo*. Bequeathal has deep similarities with cooperative  
breeding and philopatric queuing (Kokko and Johnstone 1999, Kokko and Ekman 2002,  
28 Clutton-Brock 2006) in that related individuals cooperate to improve fitness outcomes, and  
juveniles stand to inherit the natal territory. The difference is that bequeathal does not  
30 involve group co-residence, and the costs of cooperation are paid by the dispersing adult  
rather than the offspring. Nonetheless, bequeathing adults often disperse short distances  
32 to nearby sites, where proximity to kin creates additional opportunities for cooperative  
behavior to evolve. In this light, bequeathal can be viewed as a type of cooperative breeding,  
34 and is part of the spectrum of strategies that help us understand the evolution of natal  
philopatry and kin cooperation (Clutton-Brock and Lukas 2012).

36 Despite bequeathal being empirically observed for nearly 70 years (Linsdale and Tevis  
1951), there is no theoretical framework to explain its presence and absence. While natal  
38 dispersal is relatively well studied (Ronce 2007, Clobert et al. 2012), developing a greater  
understanding of bequeathal can teach us about the other side of the same behavioral  
40 coin, and adds a new dimension to our understanding of breeding dispersal (Paradis et al.  
1998, Johst and Brandl 1999, Harts et al. 2016). Studying the exceptions to the norm in  
42 evolutionary ecology is often illuminating and can provide fresh insights into well-studied  
biological processes. As dispersal is a fundamental driver affecting the ecology, evolution,  
44 and population persistence of organisms (Bowler and Benton 2005), understanding the  
conditions which favor particular types of dispersal is of much importance.

46 Empirical studies of bequeathal are rare (Berteaux and Boutin 2000). However, reported  
rates of bequeathal are as high as 68% in red squirrels (Boon et al. 2008) and 30% in kan-  
48 garoo rats (Jones 1986). All known examples of bequeathal occur in commodity-dependent  
species that require valuable resources such as a dens, burrows, middens, or resource caches  
50 for survival and reproduction (Lambin 1997). When resources critical to survival and re-  
production are substantial and difficult to secure, parents may boost offspring fitness by  
52 bequeathing the natal site. Such offspring may stand a better chance of defending the natal  
territory than dispersing and acquiring a new one. Parents, on the other hand, are often  
54 in a better position to detect vacant territories or challenge existing ownership because of  
their enhanced experience and competitive skills. However, these benefits must be balanced  
56 against potentially high conflict between parents and offspring, especially in viscous popu-  
lations (Kuijper and Johnstone 2012). This conflict of interest is inherent to a variety of  
58 social systems involving resource inheritance, such as cooperative breeding (Koenig et al.  
1992), primitively eusocial and eusocial societies (Myles 1988).

60 Other factors, including parental age and condition, offspring size and competitive ability,  
territory quality, and population density, are thought to affect bequeathal (Price and Boutin  
62 1993, Lambin 1997). However, with so many inputs, interpreting and synthesizing results  
from multiple studies is challenging. Some studies have found no relationship between  
64 parental age/condition and bequeathal (Price and Boutin 1993), while others have found  
an increase in bequeathal with age (Descamps et al. 2007). It seems clear that density  
66 matters, but how and when is unclear; bequeathal has been found to increase with local  
density in kangaroo rats (Jones 1986) but to decrease with density in Columbian ground  
68 squirrels and red squirrels (Harris and Murie 1984, Price and Boutin 1993, Boutin et al.  
1993). Similarly inconsistent patterns of density-dependent dispersal have been observed  
70 across vertebrate taxa (Matthysen 2005).

Part of the problem in interpreting the current evidence is the lack of a general theoret-  
72 ical framework for understanding bequeathal dynamics (Berteaux and Boutin 2000). The  
problem of bequeathal lies at the intersection of parent-offspring conflict and dispersal, both  
74 long and large literatures (Trivers 1974, Godfray 1995, Hamilton and May 1977, Anderson  
1989, Clobert et al. 2001, 2012). But very little work has directly addressed bequeathal.  
76 Price (1992) used dynamic programming to investigate optimal bequeathal for a single fe-  
male, finding that timing of breeding was an important determinant of its adaptive value.  
78 But as the model did not include any population, just an individual female, it is difficult

to interpret. Bequeathal, as a special form of dispersal, is inherently game theoretic, generating powerful frequency dependence. A game-theoretic model by Kokko and Lundberg (2001) comes closest to our target, in that it examines dispersal from and competition for territorial breeding sites, combined with conflict between an adult and a single offspring. However, their model examined residency in seasonal habitats with different productivity and survivorship, and it failed to find any bequeathal-like pattern among the evolutionarily stable strategies.

As a first step to building a theoretical framework for bequeathal, we present a simple bequeathal model. Our model considers parent-offspring conflict, competition for territories, local and global dispersal, and survival rates of adults and juveniles with overlapping generations. Like Kokko and Lundberg (2001), we consider production of a single offspring to avoid complications arising from sibling competition. This assumption is unrealistic in many cases, but allows for understanding of other factors before advancing to more complicated models. Unlike Kokko and Lundberg (2001) but like Hamilton and May (1977), we study a stable, uniform habitat, in order to eliminate many well-studied causes of dispersal in spatially and temporally variable environments. This is also unrealistic, but again allows for understanding the basic evolutionary logic of bequeathal, before studying it in stochastic environments, in which dispersal may be favored for other reasons.

A great deal of work remains to be done, extending these first models to consider facultative responses and additional strategies such as reproductive queuing. Still, even the simple models we analyze here are capable of producing a number of surprising dynamics. Therefore they are worth understanding in themselves before productive work can begin on extending them.

The major result of our analysis is that bequeathal is favored by the *comparative advantage* adults have in competing for sites. This advantage arises because there is more competition to acquire a new site than to retain an existing site. Since adults are better competitors, comparative advantage favors sending the better warrior to the most difficult battle. However, inclusive fitness considerations tend to work against bequeathal. Under clonal reproduction, the adult and juvenile will agree that the best warrior serve in the harshest battle. But since adults and juveniles are imperfectly related, they disagree, under some range of costs and benefits. Any factor that reduces the adult's costs will therefore help bequeathal evolve. Such factors include adults having high mortality risk and low residual reproductive value, such as at the end of life. Conversely, any factor that reduces

TABLE 1. Symbols used, with their meanings.

| Symbol | Meaning                                                      |
|--------|--------------------------------------------------------------|
| $N$    | Number of habitable sites in the population                  |
| $s_A$  | Probability adult survives to next season                    |
| $s_J$  | Probability juvenile survives to next season                 |
| $d_A$  | Probability adult survives dispersal                         |
| $d_J$  | Probability juvenile survives dispersal                      |
| $C_A$  | Relative competitive ability of adults compared to juveniles |
| $p$    | Proportion of population with Bequeath (B) strategy          |
| $n_A$  | Number of adults competing for a given site                  |
| $n_J$  | Number of juveniles competing for a given site               |
| $R$    | Expected residency rate                                      |
| $\rho$ | Coefficient of relatedness between parents and offspring     |

112 juvenile benefits will work against bequeathal. For example, if juveniles are fragile, hav-  
ing high baseline mortality, then it makes little sense to bequeath territory to them. We  
114 outline the mathematical argument that leads to these conclusions, ending the paper with  
a discussion of un-modeled factors that may also strongly influence the facultative use of  
116 bequeathal in natural populations.

## 2. MODEL DEFINITION

118 We use a mix of methods—including formal analysis, numerical sensitivity analysis, and  
individual-based simulation—to construct and understand our models of bequeathal. We  
120 begin by defining the global and local dispersal models analytically. Table 1 summarizes  
the symbols used in the models, each of which is explained in the following sections.

122 **2.1. Population and life cycle.** Imagine a population of organisms with overlapping  
generations, living at  $N$  spatially separated sites. Only one adult can survive and reproduce  
124 at each site, and each adult produces one same-sex (female) juvenile offspring each breeding  
season. The life cycle proceeds in the following sequence: 1) birth of offspring, 2) dispersal  
126 of either the offspring or parent, 3) competition for site occupancy, and 4) probability of  
survival to the next breeding season.

128 Juveniles reproductively mature in one breeding season. At the end of each breeding  
season, adults and juveniles may die, prior to reproduction in the next season. Let  $s_A$

130 be the probability a resident adult (A) survives to the next breeding season. Let  $s_J$  be  
the corresponding juvenile survival probability. When  $s_A = s_J = 1$ , all sites will remain  
132 occupied. The environment will be saturated. When either survival probability is less  
than one, some open sites may exist. Thus these models allow us to examine the effects of  
134 saturation and open environments, as emergent properties of vital parameters, rather than  
exogenous assumptions.

136 **2.2. Heritable strategies.** Assume reproduction is sexual and haploid. Also assume two  
pure heritable strategies, Bequeath (B) and Stay (S). Both strategies are expressed in adults.  
138 A bequeathing adult always disperses after reproduction, arriving at an “away” site. This  
leaves its offspring behind to compete to retain the natal “home” site. A staying adult  
140 always evicts its offspring, forcing it to compete for an “away” site, while the adult remains  
behind to compete to retain the “home” site.

142 We have also analyzed an infinite-allele model that allows continuously varying strate-  
gies between pure Bequeath and pure Stay, using a heritable probability of bequeathing.  
144 The continuous strategy space produces the same results, in this case, owing to a lack of  
geometric mean fitness effects (bet hedging), stable internal equilibria, and evolutionary  
146 branching. Therefore we stick to the discrete strategy case in this paper, for ease of un-  
derstanding. The individual-based simulation code we include in the Supplemental can be  
148 toggled to continuous strategy space for comparison.

**2.3. Dispersal.** We have analyzed two extreme dispersal models, a global model and a  
150 local model. In the global model all sites are equidistant; consequently, dispersal from any  
site has an equal probability of arriving at any other site. In the local dispersal model, sites  
152 are arranged in a ring, and individuals can disperse only to one of two neighboring sites, at  
random. Real dispersal patterns are probably intermediate between these two extremes.

154 We assume that dispersal is costly, carrying a chance of dispersal-related mortality. These  
costs may be due to increased predation risk during dispersal, energetic costs, or limited  
156 knowledge of resource availability in new sites. Let  $d_A$  be the probability that an adult  
survives dispersal and arrives at a new site. Let  $d_J$  be the probability that a juvenile  
158 survives dispersal. Typically,  $d_A > d_J$ , and so we focus on that condition, considering  
whether it is necessary or not for Bequeathal to be an ESS.

160 **2.4. Competition.** Individuals must compete to retain or colonize sites. All individuals  
who disperse into or remain in a site compete for it. We assume a lottery-type competitive

162 model, in which all individuals arriving or residing at a site simultaneously compete for it.  
Adults have an advantage over juveniles in competition, and we express this advantage as  
164 a relative advantage  $C_A > 1$ . The probability that an adult retains or occupies a site with  
 $n_A$  other adult competitors and  $n_J$  juvenile competitors is:

$$\frac{C_A}{C_A + n_A C_A + n_J(1)}.$$

166 After competition, a single individual survives to occupy each site.

2.5. **Expected fitness.** Using the assumptions above, we can write expected inclusive  
168 fitness expressions for B and S. We fully develop the global dispersal model first, before  
specifying how the local model differs. The global model can be derived for any population  
170 frequency of Bequeath,  $p$ , while the local model cannot. However, both models can be  
analyzed for the ESS conditions of both B and S.

172 2.5.1. *Global dispersal and fitness.* Let  $p$  be the proportion of the population with strategy  
B. Let  $R$  be the proportion of sites with a resident adult, at the start of each breeding  
174 season. The goal is to compute the probability  $n_A$  adults and  $n_J$  juveniles immigrate to a  
particular site. Under the assumption that dispersal events are independent of one another,  
176 the probability that  $n_A$  adults and  $n_J$  juveniles arrive at a particular site will be multinomial  
with three categories (adult, juvenile, none) and  $N - 1$  trials. As the number of sites  $N$   
178 grows large, the distribution approaches a bivariate Poisson, just like a binomial distribution  
with low probability approaches univariate Poisson as the number of trials becomes large.  
180 Therefore in the limit  $N \rightarrow \infty$ :

$$\Pr(n_A, n_J) = \frac{\lambda^n \exp(-\lambda)}{n!} \binom{n}{n_A} \pi^{n_A} (1 - \pi)^{n_J}, \quad (1)$$

where  $\lambda = R(pd_A + (1-p)d_J)$  is the average number of immigrants (either adult or juvenile)  
182 entering the site,  $n = n_A + n_J$ , and

$$\pi = \frac{pd_A}{pd_A + (1-p)d_J} \quad (2)$$

is the proportion of the surviving dispersal pool that is adult.  $\Pr(n_A, n_J)$  is just a special case  
184 of a multivariate Poisson process, with uncorrelated dimensions. But it can be motivated  
more easily by considering that dispersal events are independent Poisson samples that are  
186 equally likely to arrive at the focal site. Whether a disperser is adult or juvenile can then be  
viewed as a binomial process, independent of arrival. Note that were adults and juveniles  
188 to use different dispersal strategies, varying in distance or some other aspect, then some  
other function would be required.

190 The expected residency rate  $R$  is dynamic, but quickly reaches a steady state expectation.  
The steady state of  $R$  is defined implicitly by the recurrence:

$$R_{t+1} = R_t(\Pr(A|O)s_A + (1 - \Pr(A|O))s_J) \quad (3) \\ + (1 - R_t)(\Pr(A|V)s_A + \Pr(J|V)s_J),$$

192 where  $R_t$  is the proportion of sites that are occupied at time  $t$  and  $\Pr(A|O)$  is the probability  
an adult (A) wins a site that is occupied (O). Similarly,  $\Pr(A|V)$  is the probability an  
194 adult wins a vacant (V) site.  $\Pr(J|V)$  is the probability a juvenile (J) wins a vacant site.  
This recurrence cannot in general be solved explicitly for the steady-state value of  $R$ , the  
196 value that makes  $R_{t+1} = R_t$ . But it can be solved numerically. A Mathematica notebook  
(Wolfram Research Inc. 2010) that computes  $R$ , as well as all of the other numerical results  
198 to follow, can be found through a link in the Supplemental Materials.

Using the above definitions, we can write the expected fitness of the Bequeath (B) and  
200 Stay (S) alleles. There are two components to this fitness measure. The first is the proba-  
bility of retaining the home (natal) site. For a Bequeath individual, this is:

$$\Pr(\text{home}|B) = s_J \sum_{n_A=0}^{\infty} \sum_{n_J=0}^{\infty} \Pr(n_A, n_J) \frac{1}{1 + n_A C_A + n_J} \quad (4)$$

202 The juvenile stays at the site, competing with  $n_A$  adult immigrants and  $n_J$  juvenile immi-  
grants. The juvenile survives the season with probability  $s_J$ .

204 The other component of fitness is the probability of acquiring the away site to which the  
adult disperses. This is:

$$\Pr(\text{away}|B) = d_A s_A \sum_{n_A=0}^{\infty} \sum_{n_J=0}^{\infty} \Pr(n_A, n_J) \left( \frac{(1 - R)C_A}{C_A + n_A C_A + n_J} \quad (5) \right. \\ \left. + \frac{RpC_A}{C_A + 1 + n_A C_A + n_J} + \frac{R(1 - p)C_A}{2C_A + n_A C_A + n_J} \right)$$

206 If the bequeathing adult survives dispersal, it competes with a resident  $R$  of the time, in  
addition to another  $n_A$  adult immigrants and  $n_J$  juvenile immigrants. Since the number of  
208 sites is very large, the distribution of immigrants here is the same as before, not conditional  
on the focal immigrant, because dispersal events are independent in the Poisson process. If  
210 the number of sites were small, or dispersal were local, this would not be true, as we explain  
later.



212 Finally, we devalue fitness from the offspring, due to imperfect inheritance. This gives us  
inclusive fitness:

$$W(B) = \rho \Pr(\text{home}|B) + \Pr(\text{away}|B), \quad (6)$$

214 where  $\rho$  is the coefficient of relatedness between the adult and juvenile. For a typical  
example, this would be  $\rho = 0.5$ . But for a maternally inherited trait, it might be  $\rho = 1$ .

216 The fitness expression for the Stay strategy is constructed similarly:

$$W(S) = \Pr(\text{home}|S) + \rho \Pr(\text{away}|S), \quad (7)$$

where:

$$\Pr(\text{home}|S) = s_A \sum_{n_A=0}^{\infty} \sum_{n_J=0}^{\infty} \Pr(n_A, n_J) \frac{C_A}{C_A + n_A C_A + n_J} \quad (8)$$

$$\Pr(\text{away}|S) = d_J s_J \sum_{n_A=0}^{\infty} \sum_{n_J=0}^{\infty} \Pr(n_A, n_J) \left( \frac{1-R}{1 + n_A C_A + n_J} \right. \\ \left. + \frac{Rp}{1 + 1 + n_A C_A + n_J} + \frac{R(1-p)}{1 + C_A + n_A C_A + n_J} \right). \quad (9)$$

218 Note that while the expressions  $W(B)$  and  $W(S)$  are presented as inclusive fitness ex-  
pressions, they are just expected growth rates. No weak selection approximation or other  
220 assumptions typical of other inclusive fitness models have been made.

2.5.2. *Local dispersal and fitness.* The local dispersal model is analogous. However, the  
222 probability  $\Pr(n_A, n_J)$  under local dispersal cannot be approximated by a Poisson distribu-  
tion, even at  $N \rightarrow \infty$ , because at most two sites (neighbors) contribute dispersers to any  
224 focal site. Additionally, the disperser pool is no longer independent of a focal disperser ar-  
riving at an away site. Furthermore, it is not easy to specify the distribution of immigrants  
226 for any population frequency of Bequeath,  $p$ , because local dispersal generates spatial corre-  
lations in genotypes—the population residency rate  $R$  will not tell us the relevant residency  
228 probability at every locale.

It is possible, however, to completely define the model for invading B and invading S, that  
230 is for  $p \approx 0$  and  $p \approx 1$ . This allows us to conduct standard ESS analysis, even though we will  
not be able to find the location of any internal equilibria. This turns out to be sufficient  
232 for this model. But we have also verified all of these inferences using individual-based  
simulation, which is available through the link in Supplemental Materials.

234 Constraining  $p \in \{0, 1\}$ , the distribution of immigrants is now defined by a simple bino-  
mial process, as each neighboring site contributes an immigrant half of the time (it can go

236 in either direction), discounted by the probabilities of residency  $R$  and dispersal survival  $d_A$   
and  $d_J$ . In other words, each immigrant is a coin flip from a biased coin with probability of  
238 arrival of  $\pi = R(pd_A + (1 - p)d_J)$ .

Whether there are one or two “coins” to flip depends upon our focus. When focusing on  
240 a home site, there are two neighbors who may contribute immigrants. But when focusing  
on an away site, the focal disperser counts as one of the neighbors, and so there is only  
242 one “coin” to flip. With these facts in mind, we can define inclusive fitness much as before.  
The expressions add little insight in themselves, and so we include them only in the appen-  
244 dix. The Mathematica notebook in the Supplemental contains all of these expressions and  
computes fitness differences from them.

246

### 3. MODEL RESULTS

There are two antagonistic forces that strongly influence when Bequeath can be an ESS.  
248 The first is the *comparative advantage* that adults have in competition. This advantage  
favors Bequeath. The second force, opposed to the first, is the *conflict of interest* between  
250 parent and offspring that arises from sexual reproduction. Baseline survival, dispersal  
survival, and dispersal pattern (local or global) all interact with these two forces.

252 Even a model as simple as this one is very complex. Therefore we explain these two  
antagonistic forces first, without reference to dispersal pattern or baseline and dispersal  
254 survival rates. We consider how local and global dispersal differ, through their effects on  
comparative advantage and conflict of interest. Then we vary adult and juvenile survival  
256 rates to show how they interact with adult comparative advantage and parent-offspring  
conflict of interest.

258 **3.1. Bequeathal is favored by comparative advantage.** Assume for the moment that  
 $s_A = s_J = 1$  and that  $d_A = d_J = 1$  so that there is no baseline nor dispersal mortality.  
260 As can be seen by substituting these values in Equation 3, these assumptions imply that  
all sites are always occupied ( $R = 1$ ), a saturated environment. Figure 1 illustrates the  
262 nature of invasion and stability under these conditions. Each of the four diagrams in  
Figure 1 illustrates movement from and into a focal “home” site for a rare invader, as  
264 well as movement from and to an “away” site the invader attempts to claim. This is a  
cartoonish representation of the full model, but will serve to explain the basic forces in the  
266 model, before moving on to nuances.

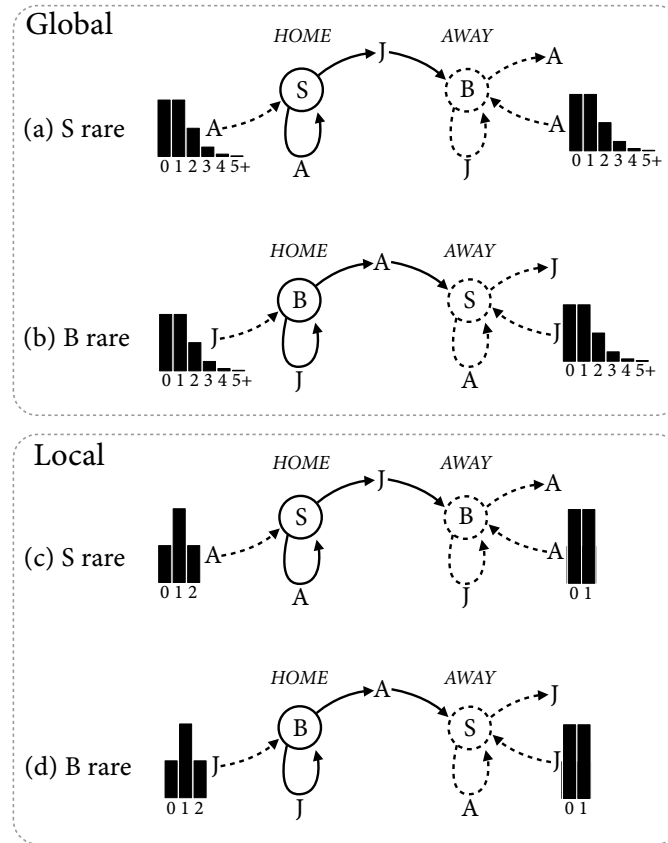

FIGURE 1. Schematic of invasion and stability in the global and local dispersal models, for  $s_A = s_J = 1$  and  $d_A = d_J = 1$ . B indicates Bequeath and S indicates Stay. Solid lines indicate invader (rare type) and dashed lines resident (common type). The clusters of black bars in each sub-figure represent probability distributions of immigrants, with numbers of immigrants labeled along the bottom. Top two schematics: Bequeath stability (top) and invasion (bottom), under global dispersal. Bottom two schematics: Local dispersal.

Consider only the top two diagrams for now, (a) and (b). These diagrams represent  
 268 Bequeath's stability (a) and invasion (b) under the global dispersal model. When B is  
 common (top), a lone S adult (A) remains at its home site, while evicting a juvenile (J) to  
 270 disperse to an away site. The home site receives dispersers from other sites, all of which are  
 occupied by B, and so all of the immigrants to the home site are adults (A). At the away  
 272 site, the juvenile S individual is joined by adults dispersing from other sites to compete  
 with a resident juvenile B individual. The distributions of immigrants at both the home

274 and away sites are the same Poisson distribution, with a mean of 1, because of the global dispersal pattern.

276 Now consider the amount of competition at home and away. To retain the home site, the adult S individual competes with, on average, 1 other adult. Any competitive advantage of adults has no effect here, because all immigrants are adult, when B is common. In contrast, 278 to acquire the away site, the lone juvenile disperser competes with a juvenile resident and, on average, 1 adult immigrant. Therefore there is one additional competitor at the away site, and the juvenile must contend with its disadvantage against an adult (assuming  $C_A > 1$ ). 282 So, Stay sends its juvenile to an away site at which it must compete against, on average, one additional juvenile. Also, any competitive advantage of adults hurts Stay, because as 284  $C_A$  increases, the chance of acquiring the away site decreases. For very large  $C_A$ , the only way for a S juvenile to acquire an away site is for no adults to immigrate.

286 The situation is nearly reversed when Bequeath invades, as shown in Figure 1(b). Now a B juvenile remains home and competes with, on average, 1 other juvenile. Immigrants 288 are all juvenile now, because Stay is common. Competitive advantage of adults ( $C_A > 1$ ) is again irrelevant for the invader retaining the home site. But at the away site, the dispersing 290 B adult does better as  $C_A$  increases, since its competitive advantage reduces the impact of any immigrant juveniles. If  $C_A = 1$  the dispersing adult acquires the away site one-third of the time, on average. But for very large  $C_A$ , it will acquire the away site one-half of the 292 time.

294 Considering both Figure 1(a) and Figure 1(b) together, the principle reason that Bequeath can be an adaptation is that it uses the comparative advantage of adults by allo- 296 cating the better warrior, the adult, to the worse battlefield, the away site. In contrast, Stay allocates the worse warrior, the juvenile, to the worse battlefield. In the mathematical 298 appendix (Equations A1 - A5a,b), we show that, as long as no other forces are in play ( $C_A > 1$  and  $\rho = 1$ ), Bequeath is always an ESS and Stay is never an ESS.

300 The same principle applies to the local dispersal model, illustrated by Figure 1(c) and (d). However, the excess competition at away sites, compared to the home site, is smaller 302 than in the global dispersal model. This fact has no impact on the long run dynamics, as long as  $\rho = 1$ . B is still favored by comparative advantage and uniquely an ESS. So we 304 postpone discussion of local dispersal until the next section.

3.2. **Sexual reproduction and conflict of interest.** The principle of comparative ad- 306 vantage will not uniquely determine the evolutionary result, unless the juvenile and adult

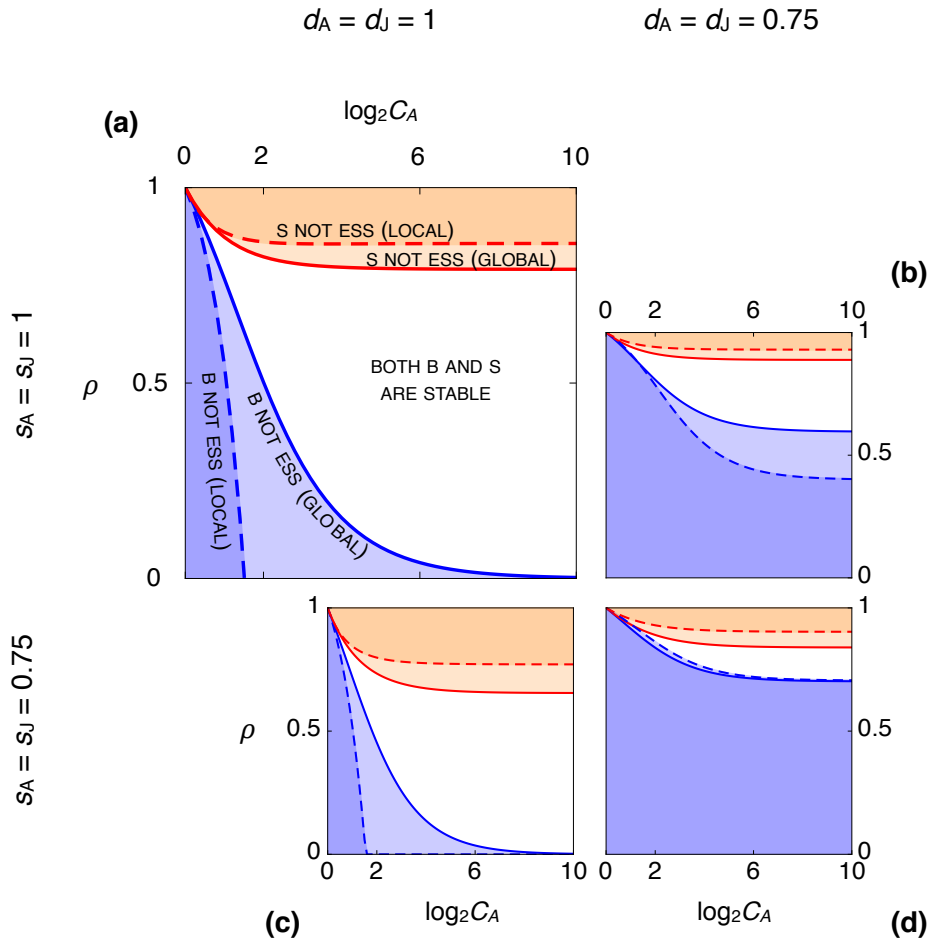

FIGURE 2. Effects of relatedness,  $\rho$ , and adult competitive ability,  $C_A$ , on stability of Bequeath and Stay. In each panel, horizontal axis is the logarithm of  $C_A$  and vertical axis is  $\rho$ . The shaded regions indicate combinations of  $C_A$  and  $\rho$  for which either Bequeath (orange) or Stay (blue) is the only ESS. In the white region, both Bequeath and Stay are ESSs. Boundaries for the global dispersal model are solid. Boundaries for the local dispersal model are dashed. Each panel shows regions for different combinations of dispersal survival and baseline survival. Top row:  $s_A = s_J = 1$ . Bottom row:  $s_A = s_J = 0.75$ . Left column:  $d_A = d_J = 1$ . Right column:  $d_A = d_J = 0.75$ .

have no conflict of interest. When  $\rho = 1$ , there is no conflict of interest, and selection favors  
 308 allocating the adult to the more dangerous away site. The adult and juvenile always agree.  
 But for  $\rho < 1$ , there is a conflict of interest, with bequeathal representing a costly action  
 310 by the adult. As  $\rho$  gets smaller, selection favors adults choosing the easier battle, which

is always the home site. However, large  $C_A$  can compensate, allowing B to continue to be  
312 stable, even when  $\rho$  is so small that B can no longer invade the population.

To appreciate how conflict of interest and comparative advantage interact, in Figure 2  
314 we map regions of stability for B and S for combinations of  $\rho$  and  $C_A$ . Focus for now on  
only the upper-left, panel (a), the enlarged plot with labeled regions. The horizontal axis  
316 is the magnitude of  $C_A$ , expressed as the base-2 logarithm, a “fold” value. If you folded a  
piece of paper in half 10 times, then its thickness would be  $2^{10}$  layers, a 10-fold increase  
318 in thickness. Likewise you can read the value  $\log_2 C_A = 10$  as a 10-fold increase in adult  
competitive ability, relative to a juvenile. The vertical axis is  $\rho$ , from complete conflict  
320 at the bottom to complete agreement at the top. The colored regions represent different  
combinations of  $\rho$  and  $C_A$  for which B and S are not evolutionarily stable. In the orange  
322 regions, S is not an ESS. In the blue regions, B is not an ESS. In the white region, both  
B and S are evolutionarily stable. The red and blue curves show the boundaries for the  
324 different dispersal models, with global dispersal represented by the solid curves and local  
by the dashed.

In Figure 2(a), there is no dispersal mortality nor baseline mortality. At the top, the  
326 results correspond to the inferences in the previous section: the comparative advantage of  
adults renders Bequeath an ESS (and Stay not an ESS) for all  $C_A > 1$  ( $\log_2 C_A > 0$ ). But  
328 as  $\rho$  decreases, the orange regions become increasingly restricted to large  $C_A$  values. By  
the time  $\rho$  reaches 0.5, corresponding to sexual reproduction, either only S is an ESS (blue  
330 regions) or both B and S are ESSs. At the limit  $\rho = 0$ , B is never an ESS, although if  $C_A$  is  
large enough, even tiny amounts of relatedness are sufficient for B to be an ESS. We prove  
332 this result in the appendix.

To understand these results, consider Stay to be a “selfish” strategy while Bequeath  
334 is “cooperative.” A Bequeath adult disperses at a personal cost, because there is more  
competition at the away site, leaving the easier home site for the juvenile to defend. When  
336  $\rho = 1$ , the interests of the adult and juvenile are completely aligned, and so the adult favors  
the strategy that results in the greatest joint success (family growth). But when  $\rho < 1$ , the  
338 adult and juvenile will disagree.

Provided  $C_A$  is large enough, B can remain stable. But for small  $C_A$ , B may not be  
340 an ESS. The reason B can be stable even when it cannot invade is because of positive  
frequency dependence. When B is rare, the adult is dispersing into a site with a resident  
342 S adult, in addition to any juvenile immigrants from other sites. For an adult, competing

344 against another adult for the away site is much harder than defending the home site from  
invading juveniles. But as  $B$  increases in frequency, more and more away sites are occupied  
346 by juveniles left behind by  $B$  adults. It is simultaneously true that more adults enter the  
dispersal pool, and so adults invade the away site. But this effect happens at both the home  
348 and away site and so does not affect the relative cost of adult dispersal. This means that  
Bequeath does better the more common it becomes, because the away site becomes easier  
350 to win, reducing the costliness of adult dispersal.

The boundaries for global and local dispersal, shown by the solid and dashed curves,  
352 sometimes differ greatly. The major effect of local dispersal is to make it harder for either  
strategy to invade the population. Local dispersal makes the white region larger, and so  
354 more combinations of parameters lead to both  $B$  and  $S$  being evolutionarily stable. To  
understand why, it is helpful to refer again to Figure 1. Under local dispersal, at most 2  
356 individuals can immigrate into any site. Therefore, while the average number of immigrants  
remains the same as in the global model, the distribution is different. First, the probability  
358 of zero immigrants at the home site is reduced under local dispersal. Under global dispersal,  
the probability of zero immigrants is  $\exp(-1) \approx 0.37$ , while under local dispersal it is only  
360 0.25 (the chance of two coin flips coming up tails). This makes the effective amount of  
competition greater under local dispersal. Second, the focal disperser now counts for one  
362 of the immigrants at the away site. So a rare strategy disperser now competes against, on  
average, one resident and one-half immigrant, instead of one resident and one immigrant,  
364 as under global dispersal. Indeed, the probability of no additional immigrants at the away  
site has increased to 0.5 under local dispersal, in contrast to 0.37 under global dispersal.

366 This reduced competition at the away site and increased competition at the home site  
helps Bequeath, by reducing the effective cost of adult dispersal. It is still true that average  
368 competition at the away site is greater than average competition at home. But a smaller  
difference under local dispersal means that  $B$  can be stable for smaller values of  $\rho$  than it can  
370 under global dispersal. Simultaneously, Stay becomes stable under local dispersal for larger  
values of  $\rho$ . The sword of local dispersal cuts both ways: a smaller cost for a dispersing adult  
372 is also a smaller benefit for a resident juvenile. This means that Bequeath gains less under  
local dispersal than it does under global, resulting in both dashed boundaries in Figure 2(a)  
374 receding and increasing the range of conditions for which both  $B$  and  $S$  are ESSs.

The other plots in Figure 2 show the interaction of  $\rho$  and  $C_A$  under different values of  
376 dispersal and baseline survival. In (c), baseline survival for both adults,  $s_A$ , and juveniles,

$s_J$ , is reduced by 25%. This creates open habitat, effectively reducing competition at the  
378 away site. Under global dispersal, the steady state residency becomes  $R \approx 0.56$ . Under local  
dispersal,  $R \approx 0.61$ . Competition at the home site is also reduced, as fewer other sites have  
380 residents to produce immigrants. But this reduction in the disperser pool applies equally to  
home and away sites. In aggregate, lowered baseline survival benefits Bequeath, by reducing  
382 the relative intensity of competition at the away site. This results in an increased orange  
region, a reduction of the region in which Stay can be an ESS.

384 In Figure 2(b), we instead reduce dispersal survival by 25%, setting  $d_A = d_J = 0.75$ .  
Dispersal mortality has the opposite effect, to aid Stay over Bequeath. Unlike a reduction  
386 in baseline survival, a reduction in dispersal survival does not necessarily result in open  
habitat. Here, the environment remains saturated at  $R = 1$ . Since residents always survive,  
388 as long as any individual arrives at a site, the site will remain occupied, eventually filling  
the environment. Now the cost of dispersal is greatly increased. If  $\rho = 1$ , this has no effect,  
390 because the adult will still agree to disperse, since both the adult and juvenile must pay  
the same dispersal cost (25%). But as long as  $\rho < 1$ , the cost quickly becomes too great for  
392 the adult, favoring Stay. The region in which B can be an ESS is greatly reduced.

Combining 25% baseline and dispersal mortality, in panel (d), demonstrates a strong  
394 interaction between these two forms of mortality. To further understand the effects of the  
mortality parameters, we proceed in the next sections by fixing  $\rho = 0.5$ , representing sexual  
396 reproduction, and allowing adult and juvenile survival rates to vary independently.

**3.3. Baseline mortality.** Figure 3 shows the effects of independently varying adult and ju-  
398 venile baseline mortality, for zero dispersal mortality (top row) and 20% dispersal mortality  
(bottom row), for two values of  $C_A$  (left and right columns). Relatedness is set to  $\rho = 0.5$ .  
400 Colors have the same meanings as before. The purple region in the lower-left of (c) and  
(d) indicates combinations of parameters at which a population of Stay individuals is non-  
402 viable, approaching a residency rate  $R = 0$ . The conditions for viability are  $s_A + p_J s_J > 1$ ,  
for a monomorphic population of Stay, and  $s_J + p_A s_A > 1$  for a monomorphic population  
404 of Bequeath. Note that Stay can be both an ESS and non-viable, as sometimes happens in  
models with both ecological and evolutionary dynamics. Also note that the conditions for  
406 viability refer to expectations. Many parameter combinations will lead to extirpation with  
high probability, even when they strictly satisfy the conditions above. Populations near the  
408 purple region are highly endangered.



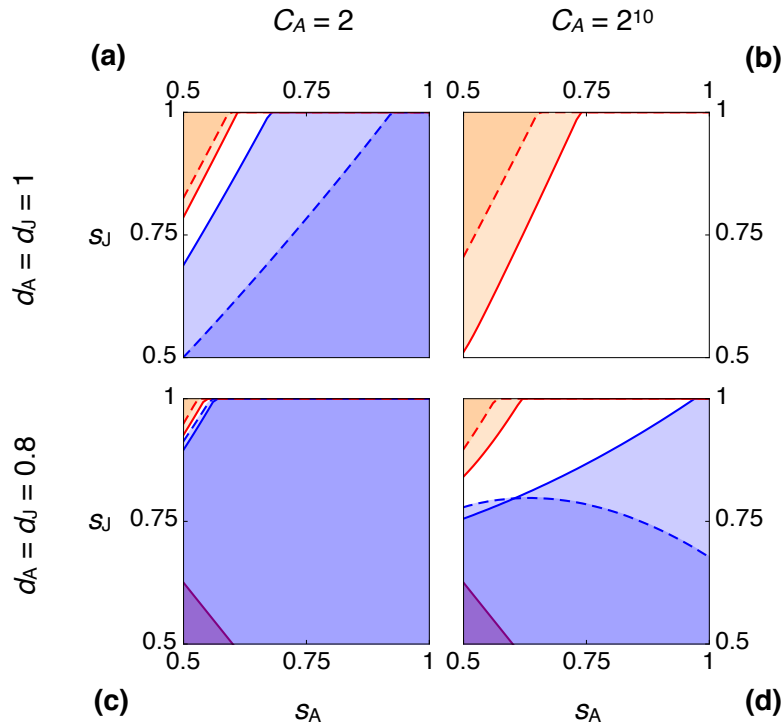

FIGURE 3. Effects of adult and juvenile baseline survival,  $s_A$  and  $s_J$ , on stability of Bequeath and Stay. Colors and curves as in Figure 2, but now with  $\rho = 0.5$  only. The purple region in the lower-left of (c) and (d) indicates parameter combinations leading to extirpation. In each panel, horizontal axis is adult survival and vertical axis is juvenile survival. Top row:  $d_A = d_J = 1$ . Bottom row:  $d_A = d_J = 0.8$ . Left column:  $C_A = 2$ . Right column:  $C_A = 2^{10}$ .

Perhaps counterintuitively, Bequeath does best when adult survival,  $s_A$ , is low while  
 410 juvenile survival,  $s_J$ , is high. When adult survival is low, the residual reproductive value  
 of an adult is also low. This effectively reduces the cost to the adult of bequeathing the  
 412 home site. Since the adult will likely die anyway, better for it to provide a benefit to the  
 offspring. However, unless  $s_J$  is also sufficiently large, the juvenile will not live to enjoy any  
 414 bequeathed benefit. As a result, the orange regions lie in the upper-left corner of each plot  
 in Figure 3.

416 Adding dispersal mortality (bottom row) and increasing adult competitive advantage  
 (right column) have the same effects as before. Dispersal mortality reduces the region in  
 418 which Bequeath can be stable. But large  $C_A$  can compensate, increasing both the region  
 in which B is the only ESS (orange) and especially the region in which both B and S are  
 420 ESSs (white). The effect of increasing  $C_A$  on the stability of Bequeath is pronounced for

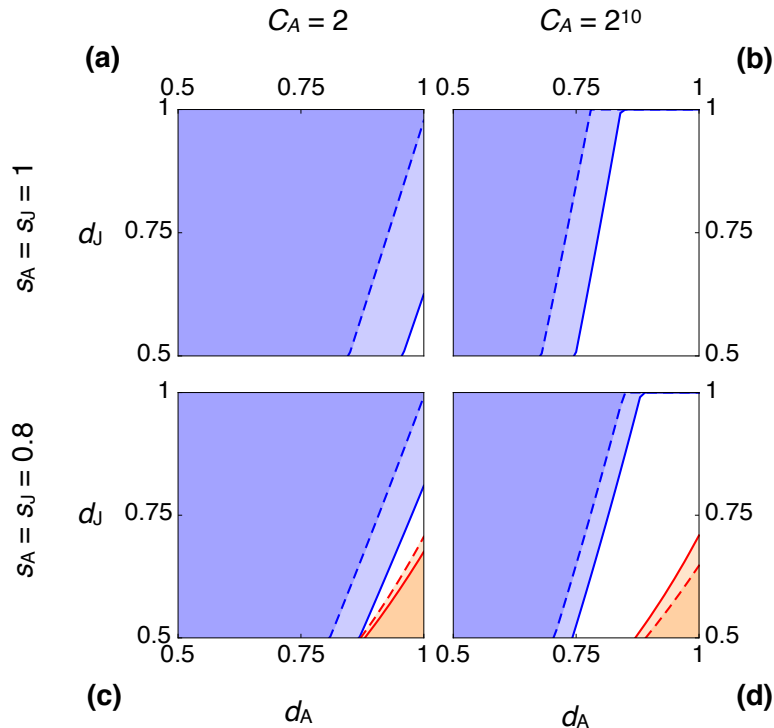

FIGURE 4. Effects of adult and juvenile dispersal survival,  $d_A$  and  $d_J$ , on stability of Bequeath and Stay. Colors and curves same as in Figure 2. In each panel, horizontal axis is adult dispersal survival and vertical axis is juvenile dispersal survival. Top row:  $s_A = s_J = 1$ . Bottom row:  $s_A = s_J = 0.8$ . Left column:  $C_A = 2$ . Right column:  $C_A = 2^{10}$ .

the local dispersal model, as seen in Figure 3(d), where B is stable for most of the total  
 422 plot, but only when dispersal is local (the dashed boundaries).

**3.4. Dispersal mortality.** Figure 4 shows the effects of independently varying adult and  
 424 juvenile dispersal mortality, for zero baseline mortality (top row) and 20% baseline mortality  
 (bottom row), for two values of  $C_A$  (left and right columns). Again,  $\rho = 0.5$  in all four plots.

426 Intuitively, Bequeath does best when adult dispersal survival,  $d_A$ , is large and juvenile  
 dispersal survival,  $d_J$ , is low. Such an asymmetry further improves the adult's comparative  
 428 advantage, by increasing the relative probability that the adult will reach the away site.  
 However, as long as  $C_A$  is large enough, there are many combinations  $d_A < d_J$  at which  
 430 Bequeath is stable, even though it cannot invade (white regions in the figure).

**3.5. Mixed equilibria.** For the vast majority of the parameter space, either Bequeath or  
 432 Stay or both are evolutionarily stable. There are no mixed, internal equilibria at which

both B and S may coexist. But when adult dispersal survival is relatively high and adult  
434 baseline survival relatively low, it is possible for the orange and blue regions to overlap, for  
neither B nor S to be an ESS. At these parameter combinations, natural selection favors a  
436 stable mix of B and S.

Figure 5(a) shows the sensitivity analysis for adult baseline and dispersal survival,  $s_A$   
438 and  $d_A$ , fixing juvenile survival to  $s_J = 0.8$  and  $d_J = 0.55$ . The orange and blue regions  
have the same meaning as in previous figures: orange indicates combinations of parameters  
440 for which Stay is not an ESS, and blue indicates combinations for which Bequeath is not  
an ESS. However, now there is a thin wedge where the orange and blue regions overlap. In  
442 this region of overlap, neither B nor S is evolutionarily stable. Notice that the region of  
overlap comprises combinations of relatively low adult baseline survival,  $s_A$ , and relatively  
444 high adult dispersal survival,  $d_A$ . Put plainly, when adults disperse well but survive poorly  
(equivalently, when juveniles disperse poorly but survive well), neither B nor S may be an  
446 ESS.

The analytical model predicts a stable mixture of B and S under these conditions. Fig-  
448 ure 5(b) uses the fitness expressions to plot the joint dynamics of  $R_t$  and  $p$ , at the parameter  
values indicated by the circle inside Figure 5(a). The orange curve is the  $p$  isocline, com-  
450 binations of  $p$  and  $R_t$  at which  $\Delta p = 0$ . Below the orange curve,  $p$  increases. Above it,  $p$   
decreases. The black curve is similarly the  $R_t$  isocline, where  $\Delta R = R_{t+1} - R_t = 0$ . An  
452 internal equilibrium lies at the intersection of these two isoclines, near  $p = 0.3, R_t = 0.28$ .

We are not sure what to predict, given the existence of these mixed equilibria. On the one  
454 hand, this dynamic may be an unlikely outcome in natural populations, as the parameter  
combinations that make it possible are rare. On the other hand, nature does not randomly  
456 sample from parameter spaces. Instead, dispersal costs and baseline mortality evolve. In  
addition, drift may be a substantial force in natural populations, and drift will interact with  
458 selection in these models, because selection alters the habitat saturation and may decrease  
effective population size.

Regardless, the existence of these mixed equilibria sheds light on the general conditions  
460 that favor both B and S, and therefore aids in understanding dispersal strategy more gen-  
erally. Specifically, we are struck by how hard we had to search to find mixed equilibria in  
462 these models. Unless dispersal and mortality are tuned in precise ways, selection will not  
464 favor a mix of B and S.

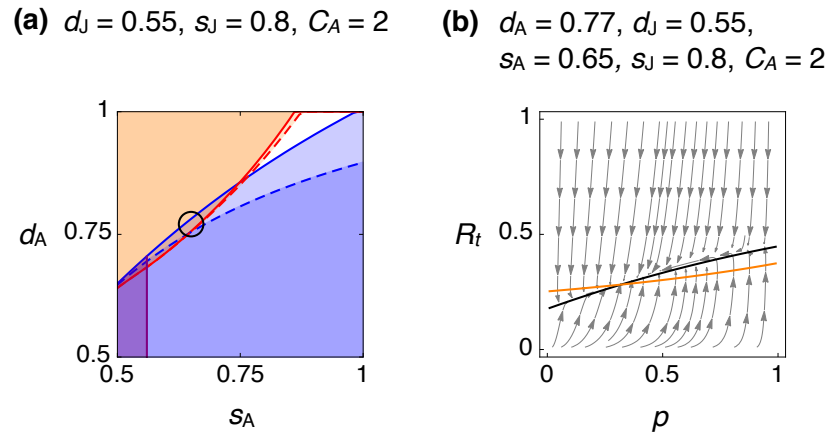

FIGURE 5. When neither B nor S is an ESS. (a) Regions in which B (blue) and S (orange) are not evolutionarily stable, as functions of adult dispersal survival  $d_A$  and adult baseline survival  $s_A$ . Other parameters fixed at  $d_J = 0.55, s_J = 0.8, C_A = 2, \rho = 0.5$ . A narrow wedge of overlap indicates combinations at which neither B nor S is an ESS. The purple region in lower-left indicates non-viable populations of S. The black circle marks the parameter values used in the other panel. (b) Vector field. The gray trajectories show the local dynamics of  $R_t$  and  $p$ . The solid black curve is the isocline for  $R_t$ , indicating combinations of  $p, R_t$  for which  $R_t$  does not change. The orange curve is the isocline for  $p$ . An equilibrium lies at the intersection of the isoclines, near  $p = 0.3$ .

#### 4. DISCUSSION

466 We have developed and analyzed two very simple models of bequeathal. In the first,  
 dispersal is global and random. In the second, dispersal is local and random. In both  
 468 models, a single adult breeder occupies a site and produces a single juvenile offspring.  
 Genes in the adult determine whether it evicts the juvenile, forcing it to disperse, or rather  
 bequeaths the site to the juvenile, dispersing itself. Both adults and juveniles must compete  
 470 with non-related individuals to retain or acquire breeding sites, and adults are advantaged  
 in such competition. Adults and juveniles experience mortality during dispersal and at  
 472 the end of each breeding season. Depending upon survival parameters, the habitat may or  
 may not be saturated, but it is always uniform and static, with respect to the number and  
 474 productivity of breeding sites.

476 Based on our results, bequeathal is most likely to be adaptive under the following condi-  
477 tions.

478 (1) *In unsaturated habitat.* An unsaturated environment, with vacant breeding sites,  
479 reduces the competition a bequeathing adult faces.

480 (2) *When adults easily defeat juveniles in contests for breeding sites.* Our models make  
481 no distinction between experience-related and size-related competitive advantages.

482 (3) *When adults are superior to juveniles in dispersal survival.* Our models do not  
483 address whether superior survival is due to greater knowledge of the habitat or  
484 greater experience avoiding predation or even greater body size.

485 (4) *When adults have less residual reproductive value than their offspring.* This can be  
486 true for example when an adult is less likely to survive to breed a second time than  
487 a juvenile is to survive to adulthood.

488 These conditions do not seem too restrictive, and indeed all of them have been suggested in  
489 the empirical literature as conditions that may favor bequeathal. As described in the *Model*  
490 *Results* section, these conditions are interactive and can sometimes counteract one another.

491 Our analysis also finds many situations in which bequeathal does not evolve, even when  
492 these conditions are satisfied (for empirical examples that fail to detect bequeathal see  
493 Lambin (1997), Selonen and Wistbacka (2017)). The major reason is that bequeathal is a  
494 cooperative behavior that may impose substantial fitness costs on the adult. As a result,  
495 often even when bequeathal is adaptive—can be maintained by natural selection—it may  
496 not be able to invade the population. For most of the parameter space in our models,  
497 bequeathal is most challenged when it is rare. This positive frequency dependence creates  
498 large regions in which both bequeathal and juvenile dispersal are evolutionarily stable,  
499 making it hard to know what to predict.

500 Prediction is made more challenging once we remember that models of this sort are rarely  
501 valuable for their direct quantitative predictions. As the first formal models of bequeathal,  
502 these had to be simple to be productive. Despite their simplicity, they exhibit complex  
503 dynamics that demonstrate the basic tradeoffs inherent in bequeathal, tradeoffs that are  
504 likely to operate in more-complex models as well as in real populations.

505 **4.1. Facultative response.** The strategies we have modeled so far are inflexible. Be-  
506 queathal in nature, like other modes of resource inheritance, is more likely part of a portfo-  
507 lio of dispersal strategies that individuals deploy facultatively, as conditions change (Myles  
508 1988). Models without explicit plasticity can sometimes be usefully interpreted as guides

to plastic response. There are also risks that plasticity will generate novel feedback. In that  
510 case, attempting to interpret evolutionary dynamics as behavioral dynamics may frustrate  
and confuse. Still, it is useful to consider facultative interpretations of our results, as it  
512 helps to integrate our models with the existing literature, as well as guide future theorizing.

We have assumed that adult competitive ability,  $C_A$ , is constant across individuals. If  
514 instead adults vary in competitive ability, and have some knowledge of it, then dispersal  
strategy may be contingent. We found that bequeathal is favored and easier to maintain  
516 when  $C_A$  is large, suggesting that larger and more aggressive individuals might do better  
pursuing bequeathal. There is also the possibility that individuals who already occupy a  
518 site have a prior residency advantage over immigrant intruders (Maynard Smith and Parker  
1976, Kokko et al. 2006). This could apply to both both non-bequeathing adults as well  
520 as juveniles who inherit breeding sites. If such an advantage were only to apply to adults,  
then the conditions favoring bequeathal would be reduced.

522 An animal using bequeathal facultatively should be more likely to bequeath in unsat-  
urated habitat than in a saturated one (Harris and Murie 1984, Price and Boutin 1993,  
524 Boutin et al. 1993). Unsaturated habitat favors bequeathal, because it reduces competition  
at an away site. Thinking ecologically, stochastic disturbance that creates new unoccupied  
526 habitat, or rather removes a large portion of the population, may encourage bequeathal.  
Provided adults enjoy higher dispersal survival than do juveniles, facultative bequeathal  
528 following disturbance or an increase in baseline mortality may allow a population to rescue  
itself. This is because habitat saturation would be higher under bequeathal than under  
530 juvenile dispersal. Such a mechanism can work in our models. If it can also function in nat-  
ural populations, even rare bequeathal following disturbance may be ecologically important,  
532 because it will allow populations to persist in otherwise challenging habitats.

Bequeathal may also be a facultative strategy at end of life (Descamps et al. 2007). We  
534 found that when adults experience higher baseline mortality than do juveniles, selection  
tends to favor bequeathal. This is because an adult with low survival expectation has low  
536 residual reproductive value. In more complex life histories, where for example the survival  
probability changes with age, it might be possible that young adults will be selected to evict  
538 offspring, while older adults are selected to bequeath.

Another aspect of life history that may lead to facultative bequeathal is timing of birth  
540 (Price 1992). When females give birth late in the season, juveniles may not have sufficient  
time to grow to a size that would allow them to successfully disperse and compete for a

542 breeding site. In contrast, an offspring born early in the season may have an advantage,  
competing against an average juvenile. If so, bequeathal may be favored late in the breeding  
544 season, even when it cannot be favored early in the season. Evidence consistent with this  
has been found in plateau pikas (Zhang et al. 2017).

546 Finally, we have treated habitat saturation as a uniform factor. In reality, local saturation  
matters more than global saturation. Adults who know their range and are aware of open  
548 sites may do better bequeathing, even though the same individuals might do better to evict  
offspring, were the local environment more saturated. Along similar lines, the models could  
550 be expanded to include a flexible search strategy during dispersal (McCarthy 1999), such  
that dispersers are more likely to colonize empty sites and avoid those that are occupied.

552 **4.2. Future directions.** Conspicuously absent strategies in our models are site sharing  
and floating. In the wider literature, e.g. Brown and Brown (1984), and in other models  
554 of breeding dispersal, such as Kokko and Lundberg (2001), adults may share sites with  
offspring. While sharing a site, offspring either postpone reproduction or reproduce at  
556 a reduced rate, while adults suffer some cost of sharing. A sharing strategy could be  
introduced into our models. Instead of bequeathing or evicting the offspring, the adult  
558 could allow the juvenile to remain at the natal site, a strategy seen in red squirrels (Berteaux  
and Boutin 2000) as well as bushy-tailed woodrats (Moses and Millar 1994). Parameters  
560 would be needed to specify juvenile and adult reproductive rates at a shared site, and unless  
juvenile reproductive rate is zero, some additional aspects of dispersal strategy would be  
562 needed to address conflict between offspring of both residents. In this way, the models  
could begin to integrate with the reproductive skew and reproductive queuing literatures  
564 (Koenig et al. 1992, Keller and Reeve 1994, Clutton-Brock 1998, Kokko and Johnstone 1999,  
Johnstone 2000, Cant and English 2006).

566 Similarly, our models could be expanded to include the possibility of floating, or waiting  
in interstitial habitat for breeding sites to become available (Penteriani et al. 2011). Allow-  
568 ing floaters would increase the average number of competitors at each site, but since this  
effect would be experienced at both Stay and Bequeath sites, it is unclear exactly how this  
570 would influence bequeathal, and would depend on the assumptions made about the survival  
and competitive abilities of floaters. Additional modeling would be needed to clarify this  
572 question.

Our models deliberately studied reproduction of a single offspring, so that we could study  
574 bequeathal in the absence of sibling rivalry and the greatly enlarged strategy space that

must arise once families can be of any size. Some of the species for which bequeathal has  
576 been observed do tend to have small litters frequently with only a single offspring surviving  
each season (e.g., woodrats McEachern et al. (2009)). However, many animals have larger  
578 litters/broods. It may be that bequeathal is likely to be rare in species with large litters,  
because of reduced offspring viability, the conflicts of interest that arise among siblings, as  
580 well as an expected increase in habitat saturation. To explore these ideas, we envision an  
expanded strategy space in which adults both evict a certain number of offspring (from zero  
582 to all) as well as determine whether the adult itself disperses (bequeaths). The bequeathal  
strategy studied in this case would correspond to adult dispersal and eviction of all but  
584 one offspring from the natal site. However many other dispersal patterns would be possible  
within this strategy space, including total eviction with adult residency and all-but-one  
586 eviction with adult residency.

A feature of bequeathal in many species is that a durable resource—often a den, burrow,  
588 or cache—is bequeathed together with the territory. Our models ignored the construction  
and persistence of such resources. Presumably there is some cost of building a den, and if  
590 adults are better able to afford these costs, then our models may underestimate bequeathal’s  
adaptiveness. As a first sketch of a model with dynamic site resources, suppose that each  
592 site is also characterized by the presence or absence of a den. When a site has a resident,  
a den can be maintained. In the absence of a resident, a den has a probability of decaying.  
594 A den can be constructed at a site at a fitness cost  $k_A$  for adults and  $k_J$  for juveniles,  
where  $k_A < k_J$ . We think this model could be analytically specified under global dispersal,  
596 generating a three dimensional dynamical system in which the frequency of bequeathal, the  
residency rate, and the proportion of sites with dens would all evolve together.

598 Our models have ignored males, treating them as ambient and causally inert. Provided  
that males are carriers of the bequeathal allele, and that there is no shortage of males,  
600 this assumption may be harmless. However, suppose instead that males also depend upon  
the same sites for survival. Then different dispersal strategies may be favored, depend-  
602 ing upon both an individual’s sex and the sex of its offspring. As observed instances of  
bequeathal appear to be sex-biased towards both females (Fisher et al. 2017) and males  
604 (Banks et al. 2002), a theoretical framework that explains the conditions under which sex-  
biased bequeathal might evolve would be of interest and would further unite the dispersal  
606 and reproductive skew literatures. It is worth noting that there are currently no empirical  
examples of adult males bequeathing territory to offspring. In many mammals, this makes



608 sense, given that males often do not co-reside with offspring or provide any parental care.  
Paternity uncertainty and the effect it has on relatedness may also discourage males from  
610 bequeathing territory.

Lastly, observed instances of bequeathal are heavily biased towards mammals, particu-  
612 larly rodents. However, there is no reason to believe that this is a uniquely mammalian  
phenomenon. Instances of bequeathal may be over-looked and attributed to adult mor-  
614 tality if the juvenile remains in the natal territory and adult movement is not tracked or  
detected. Bequeathal may be observed in other solitary breeding species with overlapping  
616 generations who depend on discreet resources such as dens, burrows, nests, or caches to  
survive— particularly if these resources are limited or costly to build. We encourage re-  
618 searchers studying dispersal in other taxa that fit these criteria to entertain bequeathal as  
an alternative dispersal hypothesis— especially in commonly known breeding dispersers like  
620 birds. This requires researches to track the relatedness of juveniles and adults in a popula-  
tion, location of adults and juveniles after breeding, and availability of potential territories  
622 in space across several breeding season to adequately identify and test the predictions of  
our model.

624

#### DATA ACCESSIBILITY

A Mathematica notebook (Wolfram Research Inc. 2010) of these models, as well as R  
626 code (R Core Team 2018) for numerical simulations, can be found at this repository: <https://github.com/bjbarrett/bequeathal>

628

#### ACKNOWLEDGMENTS

This paper is dedicated to the memory of Parry M.R. Clarke, our dear friend and colleague  
630 who did most of the theoretical work presented here. We thank members of the UC Davis Animal  
Behavior and Human Behavioral Ecology programs for their attention and advice on early versions  
632 of this work. We also thank two anonymous reviewers for their thoughtful and constructive feedback.

#### AUTHOR CONTRIBUTIONS

634 **Parry M.R. Clarke** contributed to the theoretical analysis and interpretation, and helped  
draft earlier versions of the manuscript.

636 **Mary Brooke McElreath** contributed to the original design and concept of the study,  
analysis and interpretation of the models, and helped draft the manuscript.

638 **Brendan J Barrett** contributed to the interpretation of the models, maintenance of R code  
and supplemental materials, as well as the writing and revision of the final manuscript.

640 **Karen E Mabry** contributed to the original design and concept of the study and helped  
draft the manuscript.

642 **Richard McElreath** contributed to the original design and concept of the study, supervised  
the theoretical analysis and interpretation, and helped draft the manuscript.

644

APPENDIX

**Inclusive fitness in the local dispersal model.** Limiting our definitions to  $p \in \{0, 1\}$ :

$$\begin{aligned} \Pr(\text{home}|\text{B}) &= \begin{cases} s_J \sum_{n_J=0}^2 \Pr(n_J) \frac{1}{1+n_J} & , \text{ for } p = 0 \\ s_J \sum_{n_A=0}^2 \Pr(n_A) \frac{1}{1+n_A C_A} & , \text{ for } p = 1 \end{cases} \\ \Pr(\text{away}|\text{B}) &= \begin{cases} d_A s_A \sum_{n_J=0}^1 \Pr(n_J) \left( \frac{R C_A}{2 C_A + n_J} + \frac{(1-R) C_A}{C_A + n_J} \right) & , \text{ for } p = 0 \\ d_A s_A \sum_{n_A=0}^1 \Pr(n_A) \left( \frac{R C_A}{C_A + 1 + n_A C_A} + \frac{(1-R) C_A}{C_A + n_A C_A} \right) & , \text{ for } p = 1 \end{cases} \\ \Pr(\text{home}|\text{S}) &= \begin{cases} s_A \sum_{n_J=0}^2 \Pr(n_J) \frac{C_A}{C_A + n_J} & , \text{ for } p = 0 \\ s_A \sum_{n_A=0}^2 \Pr(n_A) \frac{C_A}{C_A + n_A C_A} & , \text{ for } p = 1 \end{cases} \\ \Pr(\text{away}|\text{S}) &= \begin{cases} d_J s_J \sum_{n_J=0}^1 \Pr(n_J) \left( \frac{R}{1 + C_A + n_J} + \frac{1-R}{1+n_J} \right) & , \text{ for } p = 0 \\ d_J s_J \sum_{n_A=0}^1 \Pr(n_A) \left( \frac{R}{2 + n_A C_A} + \frac{1-R}{1+n_A C_A} \right) & , \text{ for } p = 1 \end{cases} . \end{aligned}$$

646 Inclusive fitness is defined identically to the global dispersal model, using the probabilities above:

$$W(\text{B}) = \rho \Pr(\text{home}|\text{B}) + \Pr(\text{away}|\text{B}), \quad W(\text{S}) = \Pr(\text{home}|\text{S}) + \rho \Pr(\text{away}|\text{S}).$$

648 **Bequeathal is an ESS under asexual reproduction.** Let  $d_A = d_J = s_A = s_J = \rho = 1$ . Under these conditions, the environment will remain saturated, and so  $R = 1$ . Under these conditions, the average number of immigrants to each site is 1, and all dispersers are adults. Since the environment remains saturated, the average per-site success of a common strategy must be 1 (the carrying capacity). Therefore we only need to compute the S invader fitness and compare it to 1 to prove whether B is an ESS.

654 *Global dispersal.* The probability distribution of adults arriving to a site simplifies to a straight Poisson probability:

$$\Pr(n_A) = \frac{\exp(-1)}{n_A!}. \tag{A1}$$

656 The probability that a mutant S adult retains a home site is now:

$$\Pr(\text{home}|\text{S}) = \sum_{n_A=0}^{\infty} \Pr(n_A) \frac{C_A}{C_A + n_A C_A} = \sum_{n_A=0}^{\infty} \Pr(n_A) \frac{1}{1 + n_A}. \tag{A2}$$

And the probability the dispersing juvenile S acquires the away site is:

$$\Pr(\text{away}|\text{S}) = \sum_{n_A=0}^{\infty} \Pr(n_A) \frac{1}{1 + 1 + n_A C_A}. \tag{A3}$$

658 These expressions, and their sum, are not so easy to evaluate for any  $C_A > 1$ . But we can inspect the limits and still deduce that B is an ESS for any  $C_A > 1$ . First, consider when  $C_A = 1$ . Then:

$$\lim_{C_A \rightarrow 1} \Pr(\text{home}|\text{S}) = \frac{\exp(1) - 1}{\exp(1)} \qquad \lim_{C_A \rightarrow 1} \Pr(\text{away}|\text{S}) = \exp(-1), \tag{A4a,b}$$

660 which sum to 1. So when  $C_A = 1$ , there are of course no differences between B and S strategies, so they have the same fitness. Second, consider when  $C_A \rightarrow \infty$ . Then:

$$\lim_{C_A \rightarrow \infty} \Pr(\text{home}|\text{S}) = \frac{\exp(1) - 1}{\exp(1)} \quad \lim_{C_A \rightarrow \infty} \Pr(\text{away}|\text{S}) = \exp(-1)/2, \quad (\text{A5a,b})$$

662 which sums to less than 1. Since the effect of increasing  $C_A$  on  $\Pr(\text{away}|\text{S})$  is to reduce it, B is an ESS for any  $C_A > 1$ .

664 A similar argument proves that B can always invade a population of S, under the same conditions.

*Local dispersal.* The probability that a mutant S adult retains a home site is:

$$\Pr(\text{home}|\text{S}) = \sum_{n_A=0}^2 \Pr(n_A) \frac{C_A}{C_A + n_A C_A} = \frac{1}{4}(1) + \frac{1}{2} \frac{1}{2} + \frac{1}{4} \frac{1}{3}.$$

666 And the probability the S juvenile acquires an away site is:

$$\Pr(\text{home}|\text{S}) = \sum_{n_A=0}^1 \Pr(n_A) \frac{1}{2 + n_A C_A} = \frac{1}{2} \frac{1}{2} + \frac{1}{2} \frac{1}{2 + C_A}.$$

Under asexual reproduction, mutant fitness is just the sum of these two expressions. This sum is 668 never greater than 1—resident fitness—provided  $C_A > 1$ . Therefore B is an ESS.

A similar argument shows that B can always invade S, under the same conditions.

670 **Bequeathal is an ESS under sexual reproduction, provided  $C_A$  is large enough.**

*Global dispersal.* When  $\rho < 1$ , B is not an ESS for any  $C_A > 1$ . But B is an ESS for  $C_A \rightarrow \infty$ . To 672 demonstrate this result, assume again  $d_A = d_J = s_A = s_J = 1$ . As a result, again  $R = 1$ . However, now assume  $0 < \rho < 1$ . Resident fitness will not be 1 now, but instead some fraction of 1, as offspring 674 fitness is discounted by  $\rho$ . So we must calculate both resident and invader fitness.

A resident B juvenile retains home site with probability:

$$\Pr(\text{home}|\text{B}) = \sum_{n_A=0}^{\infty} \Pr(n_A) \frac{1}{1 + n_A C_A}. \quad (\text{A6})$$

676 And a resident B adult acquires an away site with probability:

$$\Pr(\text{away}|\text{B}) = \sum_{n_A=0}^{\infty} \Pr(n_A) \frac{C_A}{C_A + 1 + n_A C_A}. \quad (\text{A7})$$

And resident B inclusive fitness is given by  $W(\text{B}) = \rho \Pr(\text{home}|\text{B}) + \Pr(\text{away}|\text{B})$ . Invader fitness is 678 as in the previous section, but with inclusive fitness  $W(\text{S}) = \Pr(\text{home}|\text{S}) + \rho \Pr(\text{away}|\text{S})$ .

Consider first when  $C_A = 1$ . Taking limits, resident fitness is:

$$\lim_{C_A \rightarrow 1} W(\text{B}) = \rho \frac{\exp(1) - 1}{\exp(1)} + \exp(-1). \quad (\text{A8})$$

680 And likewise for the invader:

$$\lim_{C_A \rightarrow 1} W(\text{S}) = \frac{\exp(1) - 1}{\exp(1)} + \rho \exp(-1). \quad (\text{A9})$$

Since  $(\exp(1) - 1)/\exp(1) > \exp(-1)$ ,  $W(S) > W(B)$  for any  $\rho < 1$ . Therefore B is never an ESS,  
682 when  $C_A = 1$  and  $\rho < 1$ . A similar argument demonstrates that S is always an ESS under the same  
conditions.

684 Now consider when  $C_A \rightarrow \infty$ . Again, taking limits:

$$\lim_{C_A \rightarrow \infty} W(B) = \rho \exp(-1) + \frac{\exp(1) - 1}{\exp(1)}, \quad (\text{A10})$$

$$\lim_{C_A \rightarrow \infty} W(S) = \frac{\exp(1) - 1}{\exp(1)} + \frac{\rho}{2} \exp(-1). \quad (\text{A11})$$

And now  $W(B) > W(S)$  for any  $\rho > 0$ .

686 Therefore B is an ESS, once  $C_A$  is sufficiently large. We cannot prove analytically how large  $C_A$   
must be to cross the threshold required to make B an ESS. But we can be sure such a threshold  
688 exists, as the effect of  $C_A$  on the probabilities of winning sites is monotonic.

*Local dispersal.* In the case of local dispersal, an exact condition can be derived. B is an ESS,  
690 provided:

$$\rho > \frac{14 + C_A(25 + C_A(1 - 4C_A))}{3(4 + C_A(7 + C_A))}.$$

Unfortunately, nothing can be gained by inspecting this inequality directly, aside from noting that  
692 greater relatedness favors Bequeathal. This inequality defines the dashed blue boundary in Fig-  
ure 2(a).

694

REFERENCES

- Anderson, P. (1989). *Dispersal in rodents: a resident fitness hypothesis*. American Society  
696 of Mammalogists.
- Aronsson, M. and Persson, J. (2018). Female breeding dispersal in wolverines, a solitary  
698 carnivore with high territorial fidelity. *European Journal of Wildlife Research*, 64(1):7.
- Banks, S. C., Skerratt, L. F., and Taylor, A. C. (2002). Female dispersal and relatedness  
700 structure in common wombats (*vombatus ursinus*). *Journal of Zoology*, 256(3):389–399.
- Berteaux, D. and Boutin, S. (2000). Breeding dispersal in female north american red  
702 squirrels. *Ecology*, 81(5):1311–1326.
- Boon, A. K., Reale, D., and Boutin, S. (2008). Personality, habitat use, and their con-  
704 sequences for survival in north american red squirrels *Tamiasciurus hudsonicus*. *Oikos*,  
117(9):1321–1328.
- Boutin, S., Tooze, Z., and Price, K. (1993). Postbreeding dispersal by female red squirrels  
706 (*Tamiasciurus hudsonicus*)- the effect of local vacancies. *Behavioral Ecology*, 4(2):151–  
708 155.
- Bowler, D. and Benton, T. (2005). Causes and consequences of animal dispersal strategies:  
710 relating individual behaviour to spatial dynamics. *Biological Reviews*, 80(2):205–225.
- Brown, J. L. and Brown, E. R. (1984). Parental facilitation: parent-offspring relations in  
712 communally breeding birds. *Behavioral Ecology and Sociobiology*, 14(3):203–209.
- Cant, M. and English, S. (2006). Stable group size in cooperative breeders: the role of  
714 inheritance and reproductive skew. *Behavioral Ecology*, 17:560–568.
- Clobert, J., Baguette, M., Benton, T. G., and Bullock, J. M., editors (2012). *Dispersal*  
716 *Ecology and Evolution*. Oxford University Press.
- Clobert, J., Danchin, E., Dhondt, A., and Nichols, J., editors (2001). *Dispersal*. Oxford  
718 University Press, New York.
- Clutton-Brock, T. (1998). Reproductive skew, concessions and limited control. *Trends in*  
720 *Ecology and Evolution*, 13:288–292.
- Clutton-Brock, T. and Lukas, D. (2012). The evolution of social philopatry and dispersal  
722 in female mammals. *Molecular Ecology*, 21:472–492.
- Clutton-Brock, T. H. (2006). *Cooperative breeding in mammals*, pages 173–190. Springer  
724 Berlin Heidelberg, Berlin, Heidelberg.
- Cunningham, S. (2005). *Dispersal and inheritance in the dusky-footed woodrat, Neotoma*  
726 *fuscipes (Ph.D. Dissertation)*. Ph.d., University of California, Berkeley.

- Descamps, S., Boutin, S., Berteaux, D., and Gaillard, J. M. (2007). Female red squirrels  
728 fit williams' hypothesis of increasing reproductive effort with increasing age. *Journal of  
Animal Ecology*, 76(6):1192–1201.
- 730 Fisher, D. N., Boutin, S., Dantzer, B., Humphries, M. M., Lane, J. E., and McAdam, A. G.  
(2017). Multilevel and sex-specific selection on competitive traits in north american red  
732 squirrels. *Evolution*.
- Godfray, H. C. J. (1995). Evolutionary theory of parent-offspring conflict. *Nature*, 376:133–  
734 138.
- Hamilton, W. D. and May, R. M. (1977). Dispersal in stable habitats. *Nature*,  
736 269(5629):578–581.
- Harris, M. and Murie, J. (1984). Inheritance of nest sites in female columbian ground  
738 squirrels. *Behavioral Ecology and Sociobiology*, 15:97–102.
- Harts, A. M., Jaatinen, K., and Kokko, H. (2016). Evolution of natal and breeding dispersal:  
740 when is a territory an asset worth protecting? *Behavioral Ecology*, 27(1):287–294.
- Johnson, C. and Crossman, D. (1991). Dispersal and social organization of the northern  
742 hairy-nosed wombat *lasiorhinus krefftii*. *Journal of Zoology*, 225(4):605–613.
- Johnstone, R. (2000). Models of reproductive skew: A review and synthesis. *Ethology*,  
744 106:5–26.
- Johst, K. and Brandl, R. (1999). Natal versus breeding dispersal: evolution in a model  
746 system. *Evolutionary Ecology Research*, 1:911–921.
- Jones, W. T. (1986). Survivorship in philopatric and dispersing kangaroo rats (*Dipodomys  
748 spectabilis*). *Ecology*, 67(1):202–207.
- Keller, L. and Reeve, H. (1994). Partitioning of reproduction in animal societies. *Trends in  
750 Ecology and Evolution*, 9:98–102.
- Koenig, W., Pitelka, F., Carmen, W., Mumme, R., and Stanback, M. (1992). The evolution  
752 of delayed dispersal in cooperative breeders. *The Quarterly Review of Biology*, 67:111–150.
- Kokko, H. and Ekman, J. (2002). Delayed dispersal as a route to breeding: territorial  
754 inheritance, safe havens, and ecological constraints. *The American Naturalist*, 160(4):468–  
484.
- 756 Kokko, H. and Johnstone, R. (1999). Social queuing in animal societies: A dynamic model  
of reproductive skew. *Proceedings of the Royal Society Biological Sciences Series B*,  
758 266:571–578.

- Kokko, H. and Lundberg, P. (2001). Dispersal, migration, and offspring retention in saturated habitats. *The American Naturalist*, 157(2):188–202.
- Kokko, H., López-Sepulcre, A., and Morrell, L. (2006). From hawks and doves to self-consistent games of territorial behavior. *The American Naturalist*, 167(6):901–912. PMID: 16685641.
- Kuijper, B. and Johnstone, R. (2012). How dispersal influences parent-offspring conflict over investment. *Behavioral Ecology*.
- Lambin, X. (1997). Home range shifts by breeding female townsend’s voles (*Microtus townsendii*): A test of the territory bequeathal hypothesis. *Behavioral Ecology and Sociobiology*, 40(6):363–372.
- Linsdale, J. and Tevis, L. (1951). *The dusky-footed woodrat*. University of California Press, Berkeley.
- Matthysen, E. (2005). Density-dependent dispersal in birds and mammals. *Ecography*, 28(3):403–416.
- Maynard Smith, J. and Parker, G. (1976). The logic of asymmetric contests. *Animal Behaviour*, 24(1):159–175. cited By 1156.
- McCarthy, M. (1999). Effects of competition on natal dispersal distance. *Ecological Modelling*, 114(2):305 – 310.
- McEachern, M. B., McElreath, R. L., Van Vuren, D. H., and Eadie, J. M. (2009). Another genetically promiscuous ‘polygynous’ mammal: mating system variation in *Neotoma fuscipes*. *Animal Behaviour*, 77(2):449–455.
- Moses, R. and Millar, J. (1994). Philopatry and mother-daughter associations in bushy-tailed woodrats: space use and reproductive success. *Behavioral Ecology and Sociobiology*, 35:131–140.
- Myles, T. (1988). *The ecology of social behavior*, chapter Resource inheritance in social evolution from termites to man. Academic Press, Inc., San Diego.
- Paradis, E., Baillie, S., Sutherland, W., and Gregory, R. D. (1998). Patterns of natal and breeding dispersal in birds. *Journal of Animal Ecology*, 67(4):518–536.
- Penteriani, V., Ferrer, M., and Delgado, M. M. (2011). Floater strategies and dynamics in birds, and their importance in conservation biology: towards an understanding of nonbreeders in avian populations. *Animal Conservation*, 14(3):233–241.
- Price, K. (1992). Territory bequeathal by red squirrel mothers: a dynamic model. *Bulletin of Mathematical Biology*, 54(2-3):335–354.



- 792 Price, K. and Boutin, S. (1993). Territory bequeathal by red squirrel mothers. *Behavioral Ecology*, 4(2):144–150.
- 794 R Core Team (2018). *R: A Language and Environment for Statistical Computing*. R Foundation for Statistical Computing, Vienna, Austria.
- 796 Ronce, O. (2007). How does it feel to be like a rolling stone? ten questions about dispersal evolution. *Annual Review of Ecology, Evolution, and Systematics*, 38(1):231–253.
- 798 Selonen, V. and Wistbacka, R. (2017). Role of breeding and natal movements in lifetime dispersal of a forest-dwelling rodent. *Ecology and Evolution*, 7(7):2204–2213.
- 800 Trivers, R. L. (1974). Parent-offspring conflict. *American Zoologist*, 14:249–264.
- Wolfram Research Inc. (2010). *Mathematica 8.0*.
- 802 Zhang, L., Qu, J., Li, K., Li, W., Yang, M., and Zhang, Y. (2017). Genetic diversity and sex-bias dispersal of plateau pika in tibetan plateau. *Ecology and Evolution*, 7(19):7708–
- 804 7718.
